# Supplementary material for: Estimating prevalence of human traits among populations from polygenic risk scores
Source: PubMed Central journal article supplement (PMC8670062; doi:10.1186/s40246-021-00370-z), 2021-12-13
Supplement: 40246_2021_370_MOESM4_ESM.pdf [file 40246_2021_370_MOESM4_ESM.pdf]

A

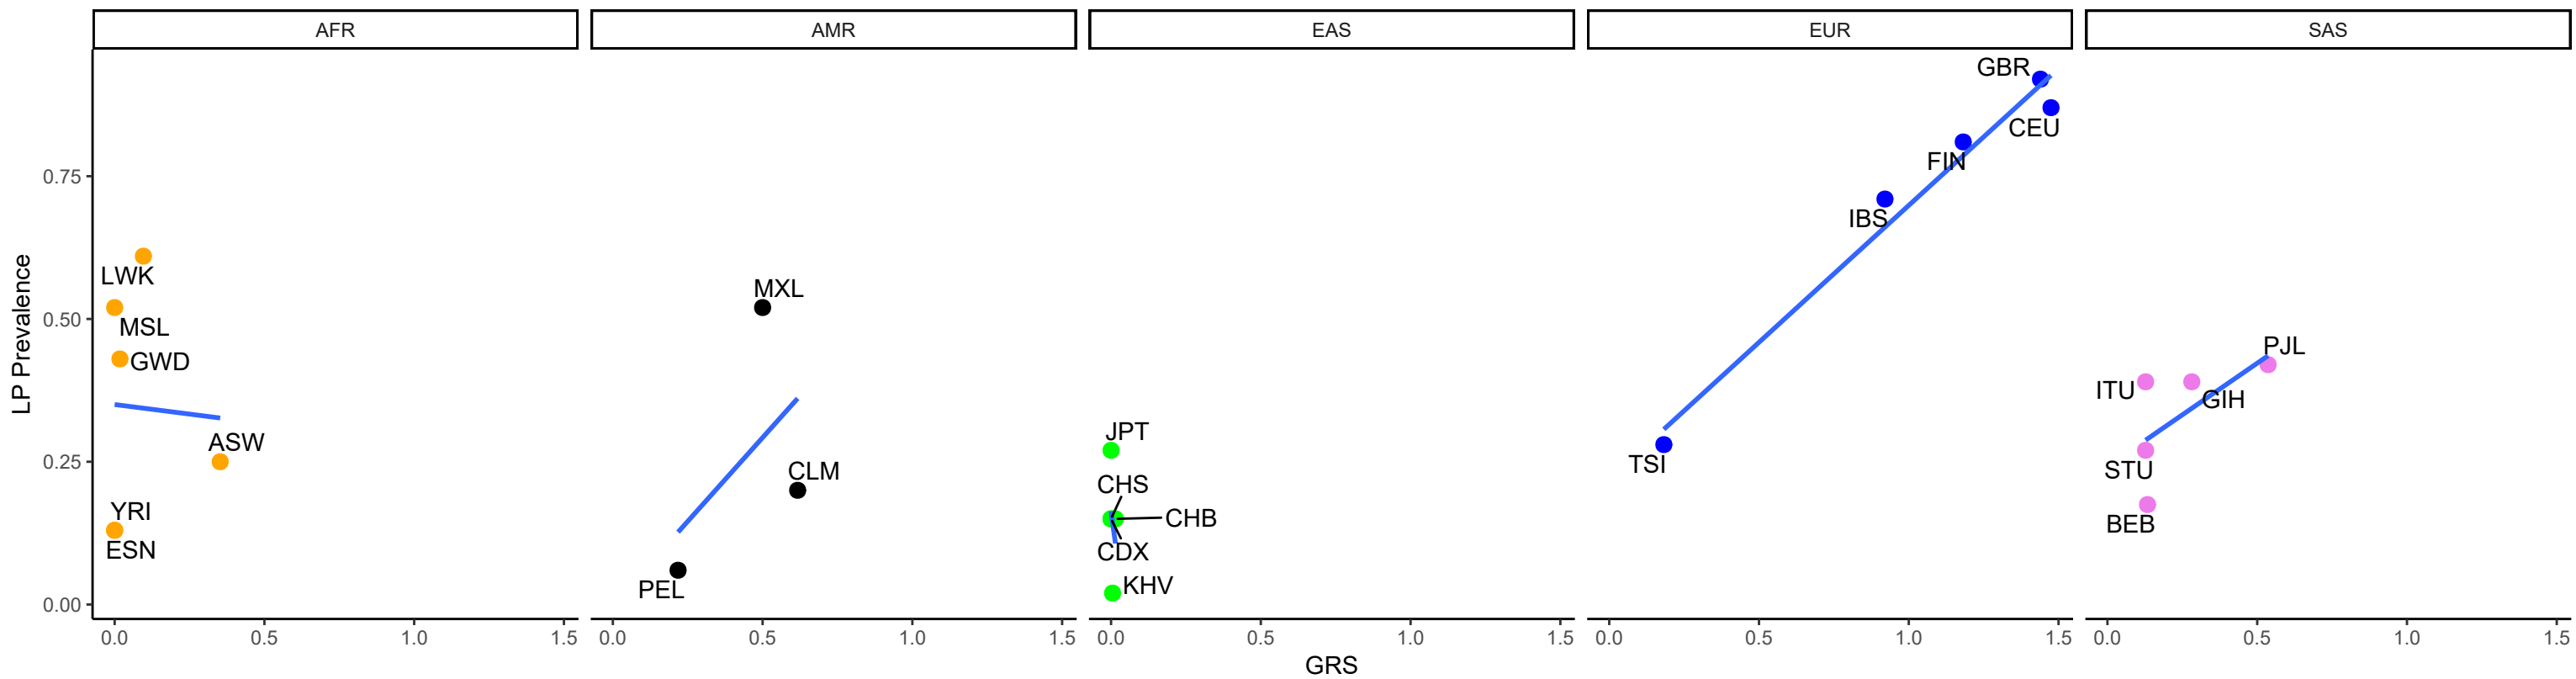

B

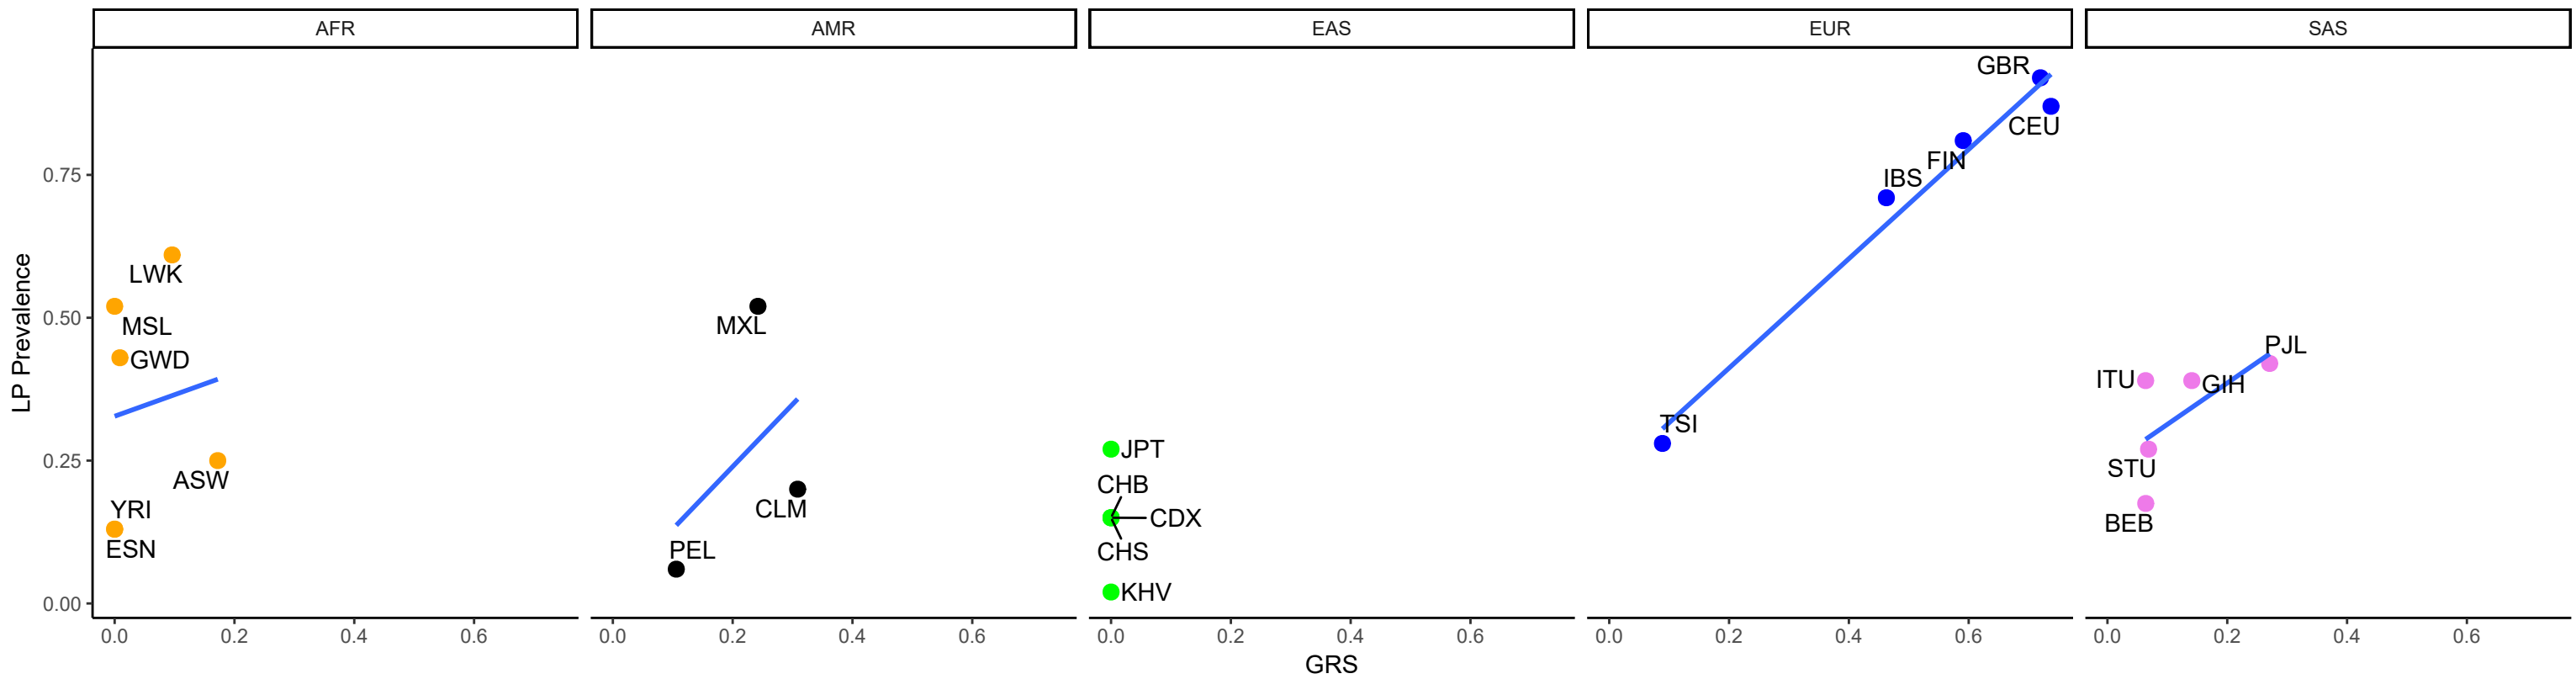

superpopulation ● AFR ● AMR ● EAS ● EUR ● SAS
